# Supplementary material
Source: PubMed Central journal article supplement (PMC7594158)

## **Isolation and metabolic assessment of cancer cell mitochondria**

Nguyen Phuoc Long<sup>1,#</sup>, Jung Eun Min<sup>1,#</sup>, Nguyen Hoang Anh<sup>1</sup>, Sun Jo Kim<sup>1</sup>, Seongoh Park<sup>2</sup>, Hyung Min Kim<sup>1</sup>,  
Sang Jun Yoon<sup>1</sup>, Johan Lim<sup>3</sup>, Seul Ji Lee<sup>1</sup>, Sung Won Kwon<sup>1,4,\*</sup>

<sup>1</sup>College of Pharmacy, Seoul National University, Seoul, 08826, Republic of Korea

<sup>2</sup>Department of Statistics, Sungshin Women's University, Seoul, 02844, Republic of Korea

<sup>3</sup>Department of Statistics, Seoul National University, Seoul, 08826, Republic of Korea

<sup>4</sup>Plant Genomics and Breeding Institute, Seoul National University, Seoul 08826, Republic of Korea

#These authors contributed equally to this work.

\*To whom correspondence should be addressed: S.W.K. (swkwon@snu.ac.kr)

## **Table of contents**

**Table S1:** Metabolite composition of mitochondria as compared to that of bulk cancer cells.

**Table S2:** Differentially expressed lipids among the three indicated cell lines.

**Table S3:** MS-DIAL lipid data alignment and processing.

**Figure S1:** The expression level of FASH, ACC, SCL25A1, and ACLY in the three indicated cancer cell lines.

**Figure S2:** Lipid compositions of mitochondria and bulk A549 cells.

**Figure S3:** Lipid compositions of mitochondria and bulk MDA-MB-231 cells.

**Figure S4:** Lipid compositions of mitochondria and bulk PANC1 cells.

**Table S1:** Metabolite composition of mitochondria as compared to that of bulk cancer cells.

| Significantly compartmentalized species <sup>#</sup> | KEGG ID | HMDB ID     | A549       |            |                          | MDA-MB-231 |            |             | PANC1      |            |             |
|------------------------------------------------------|---------|-------------|------------|------------|--------------------------|------------|------------|-------------|------------|------------|-------------|
|                                                      |         |             | P-value    | FDR        | Fold change <sup>^</sup> | P-value    | FDR        | Fold change | P-value    | FDR        | Fold change |
| 1-methylhistidine                                    | C01152  | HMDB0000001 | 0.0004357  | 0.0031524  | 0.64226                  | 0.00011651 | 0.0016959  | 0.057509    | 0.001417   | 0.0076004  | 0.068508    |
| (DL)-2-aminooctanoic acid                            |         | HMDB0000991 | 0.00018553 | 0.0017554  | 0.085595                 | 7.0587E-05 | 0.0011947  | 0.039536    |            |            |             |
| 3-methylphenylacetic acid                            |         | HMDB0002222 |            |            |                          | 0.0071085  | 0.022172   | 3.2268      |            |            |             |
| DL-O-phosphoserine                                   | C01005  | HMDB0001721 | 0.0033117  | 0.0106     | 0.32724                  |            |            |             |            |            |             |
| L-acetylcarnitine                                    | C02571  | HMDB0000201 |            |            |                          | 1.8102E-05 | 0.00059285 | 0.31426     | 1.1871E-05 | 0.00039121 | 0.20179     |
| Adenosine                                            | C00212  | HMDB0000050 | 3.1699E-05 | 0.00063204 | 62.043                   | 0.00015018 | 0.0017884  | 1535.3      |            |            |             |
| L-alanine                                            | C00041  | HMDB0000161 | 0.018459   | 0.039833   | 3.3582                   | 0.010572   | 0.030104   | 2.8844      | 0.0051429  | 0.015354   | 3.1408      |
| AMP                                                  | C00020  | HMDB0000045 | 2.1052E-05 | 0.00056382 | 201.66                   | 0.0011942  | 0.0059742  | 79.679      | 6.2407E-05 | 0.00097652 | 287.7       |
| L-arginine                                           | C00062  | HMDB0000517 | 3.9427E-06 | 0.00016165 | 10.627                   | 7.2961E-05 | 0.0011947  | 11.446      | 0.0016838  | 0.0082787  | 4.1668      |
| L-aspartic acid                                      | C00049  | HMDB0000191 |            |            |                          | 0.003826   | 0.012851   | 3.2109      |            |            |             |
| Betaine                                              | C00719  | HMDB0000043 | 0.0026409  | 0.009023   | 2.9761                   | 0.0012307  | 0.0059742  | 1.7276      | 6.7751E-05 | 0.00097652 | 2.063       |
| Biotin                                               | C00120  | HMDB0000030 | 0.0000616  | 0.00075768 | 65.188                   |            |            |             |            |            |             |
| Carbamoyl phosphate                                  | C00169  | HMDB0001096 |            |            |                          | 0.012977   | 0.034545   | 0.311       |            |            |             |
| L-carnitine                                          | C00318  | HMDB0000062 | 0.018134   | 0.039833   | 0.32266                  | 0.00027027 | 0.002529   | 0.53396     | 7.9976E-06 | 0.00039121 | 0.23756     |
| Cholesterol sulfate                                  | C18043  | HMDB0000653 | 0.013288   | 0.030837   | 67.298                   |            |            |             |            |            |             |
| Choline                                              | C00114  | HMDB0000097 |            |            |                          | 0.00076725 | 0.0047994  | 0.089895    | 0.00007448 | 0.00097652 | 0.064635    |
| Citric acid                                          | C00158  | HMDB0000094 | 0.001826   | 0.0072452  | 0.15021                  | 0.0014716  | 0.0066475  | 0.08974     | 0.012413   | 0.028596   | 0.077278    |
| Cytidine monophosphate                               | C00055  | HMDB0000095 | 0.0034041  | 0.0106     | 3.1559                   |            |            |             | 0.0018901  | 0.008921   | 12.577      |
| Creatine                                             | C00300  | HMDB0000064 | 0.021556   | 0.043466   | 0.42879                  |            |            |             | 0.012516   | 0.028596   | 2.4728      |
| Creatinine                                           | C00791  | HMDB0000562 |            |            |                          |            |            |             | 0.01264    | 0.028596   | 0.45795     |
| Cytidine triphosphate (neg)                          | C00063  | HMDB0000082 | 0.00011099 | 0.0012411  | 0.077154                 | 0.0030379  | 0.011054   | 0.11478     | 0.0004138  | 0.0034878  | 0.073413    |
| L-cystathionine                                      | C02291  | HMDB0000099 | 0.0017384  | 0.0071276  | 0.041502                 |            |            |             | 0.0020732  | 0.0090607  | 0.044002    |

|                                     |        |             |            |            |          |            |           |          |            |           |          |
|-------------------------------------|--------|-------------|------------|------------|----------|------------|-----------|----------|------------|-----------|----------|
| <b>Cytidine</b>                     | C00475 | HMDB0000089 | 0.0019661  | 0.0073284  | 10.649   |            |           |          |            |           |          |
| <b>Cytosine</b>                     | C00380 | HMDB0000630 | 0.0007634  | 0.0044713  | 1.4481   | 0.0039468  | 0.012926  | 9.9949   |            |           |          |
| <b>dCMP</b>                         | C00239 | HMDB0001202 |            |            |          |            |           |          | 0.0012767  | 0.0071739 | 14.316   |
| <b>Deoxyadenosine</b>               | C00559 | HMDB0000101 |            |            |          | 0.015032   | 0.037153  | 4.4506   |            |           |          |
| <b>Glyceraldehyde 3-phosphate</b>   | C00661 | HMDB0001112 |            |            |          |            |           |          | 0.010426   | 0.025108  | 0.17925  |
| <b>dGMP</b>                         | C00362 | HMDB0001044 | 0.0065675  | 0.017283   | 2.8315   |            |           |          | 0.0074513  | 0.020935  | 29.152   |
| <b>dGTP</b>                         | C00286 | HMDB01440   | 0.00017677 | 0.0017554  | 0.032272 | 0.00020972 | 0.0021133 | 0.051328 | 0.0095206  | 0.024422  | 0.046158 |
| <b>Dimethylglycine</b>              | C01026 | HMDB0000092 | 0.0002201  | 0.0018048  | 2.9691   |            |           |          |            |           |          |
| <b>Ethanolamine</b>                 | C00189 | HMDB0000149 |            |            |          | 0.0037648  | 0.012851  | 2.3178   |            |           |          |
| <b>FAD</b>                          | C00016 | HMDB0001248 | 0.009621   | 0.022757   | 3.4337   | 0.013185   | 0.034545  | 6.6938   | 0.00015017 | 0.0014767 | 11.443   |
| <b>Fumaric acid</b>                 | C00122 | HMDB0000134 | 0.0056747  | 0.015511   | 0.36404  | 0.0017729  | 0.007038  | 0.09228  | 0.0015052  | 0.0077224 | 0.13329  |
| <b>Guanosine diphosphate (neg)</b>  | C00035 | HMDB0001201 | 0.020395   | 0.04325    | 0.49671  |            |           |          | 0.018332   | 0.037296  | 0.44715  |
| <b>Glucosamine</b>                  | C00329 | HMDB0001514 | 0.0041807  | 0.012243   | 6.327    | 0.0012313  | 0.0059742 | 8.3653   | 0.019114   | 0.038228  | 4.4973   |
| <b>L-glutamic acid</b>              | C00025 | HMDB0000148 | 0.021486   | 0.043466   | 1.756    |            |           |          | 0.0035567  | 0.012344  | 0.45762  |
| <b>L-glutamine</b>                  | C00064 | HMDB0000641 | 0.01477    | 0.033642   | 0.69545  | 0.014091   | 0.035498  | 1.632    | 0.00063344 | 0.0044442 | 0.30336  |
| <b>Oxidized glutathione (neg)</b>   | C00127 | HMDB0003337 |            |            |          | 0.00044378 | 0.0034197 | 0.38492  |            |           |          |
| <b>Oxidized glutathione (pos)</b>   | C00127 | HMDB0003337 | 0.0014772  | 0.0064889  | 4.1723   |            |           |          | 0.017479   | 0.036184  | 2.7323   |
| <b>Glutathione (neg)</b>            | C00051 | HMDB0000125 | 0.0018969  | 0.0072912  | 0.056641 | 0.016875   | 0.040194  | 0.1061   | 0.010372   | 0.025108  | 0.14597  |
| <b>Glycerophosphocholine</b>        | C00670 | HMDB0000086 | 0.0010612  | 0.0056751  | 2.0936   |            |           |          |            |           |          |
| <b>Glycine</b>                      | C00037 | HMDB0000123 | 0.0085423  | 0.021443   | 0.21493  |            |           |          | 0.003187   | 0.011691  | 0.16386  |
| <b>Guanosine triphosphate (neg)</b> | C00044 | HMDB0001273 | 0.00002292 | 0.00056382 | 0.048887 | 0.00073566 | 0.0047994 | 0.09636  | 0.0023439  | 0.009878  | 0.095995 |
| <b>Guanine</b>                      | C00242 | HMDB0000132 |            |            |          | 0.010157   | 0.029633  | 0.3167   |            |           |          |
| <b>Guanosine</b>                    | C00387 | HMDB0000133 |            |            |          |            |           |          | 0.0052048  | 0.015354  | 0.09916  |
| <b>L-homoserine</b>                 | C00263 | HMDB0000719 | 0.00021687 | 0.0018048  | 0.36522  |            |           |          |            |           |          |
| <b>4-hydroxyproline</b>             | C01157 | HMDB0000725 | 0.00048386 | 0.0033064  | 0.13216  |            |           |          | 0.022475   | 0.043538  | 0.20325  |
| <b>Imidazoleacetic acid</b>         | C02835 | HMDB0002024 |            |            |          |            |           |          | 0.0029018  | 0.011587  | 20.089   |
| <b>Inosine</b>                      | C00294 | HMDB0000195 |            |            |          | 0.0028274  | 0.010582  | 0.037887 |            |           |          |

|                                    |        |             |            |            |          |            |            |          |            |            |          |
|------------------------------------|--------|-------------|------------|------------|----------|------------|------------|----------|------------|------------|----------|
| <b>Lactic acid</b>                 | C00186 | HMDB0000190 | 0.0025801  | 0.009023   | 0.17959  | 0.0036889  | 0.012851   | 0.2548   |            |            |          |
| <b>L-leucine</b>                   | C00123 | HMDB0000687 | 0.00034937 | 0.0026858  | 0.020292 | 2.125E-06  | 0.00010802 | 0.021592 | 1.3262E-05 | 0.00039121 | 0.010231 |
| <b>Malic acid</b>                  | C00149 | HMDB0000156 | 0.0014098  | 0.0064889  | 3.5187   |            |            |          |            |            |          |
| <b>Maleic acid</b>                 | C01384 | HMDB0000176 |            |            |          |            |            |          | 0.00090016 | 0.0053109  | 43.802   |
| <b>L-methionine</b>                | C00073 | HMDB0000696 | 5.0352E-07 | 3.0966E-05 | 0.016299 | 0.00098718 | 0.0054199  | 0.046979 | 6.5509E-06 | 0.00039121 | 0.015418 |
| <b>Methionine sulfoxide</b>        | C02989 | HMDB0002005 | 0.00052565 | 0.0034029  | 38.112   | 0.0017256  | 0.007038   | 52.496   | 0.00071945 | 0.0046888  | 25.066   |
| <b>1-methylnicotinamide</b>        | C02918 | HMDB0000699 | 0.0091977  | 0.022183   | 0.10971  | 0.0093841  | 0.028589   | 0.10159  | 0.0051601  | 0.015354   | 0.053379 |
| <b>Myo-inositol</b>                | C00137 | HMDB0000211 |            |            |          |            |            |          | 0.010003   | 0.025108   | 0.40343  |
| <b>N-acetylputrescine</b>          | C02714 | HMDB0002064 |            |            |          |            |            |          | 0.001987   | 0.0090179  | 6.7473   |
| <b>NAD (neg)</b>                   | C00003 | HMDB0000902 |            |            |          |            |            |          | 0.0067107  | 0.019314   | 8.5007   |
| <b>NAD (pos)</b>                   | C00003 | HMDB0000902 | 4.6247E-05 | 0.00063204 | 9.8006   | 0.00059524 | 0.004332   | 2.7744   | 0.00013532 | 0.0014516  | 12.88    |
| <b>Asymmetric dimethylarginine</b> | C03626 | HMDB0001539 | 0.0047949  | 0.013404   | 8.8148   |            |            |          | 0.00010167 | 0.0011997  | 9.2401   |
| <b>Nicotinamide</b>                | C00153 | HMDB0001406 |            |            |          | 3.8175E-07 | 5.0009E-05 | 2.6344   |            |            |          |
| <b>Nicotinamide ribotide</b>       | C00455 | HMDB0000229 | 0.0014696  | 0.0064889  | 0.27147  |            |            |          |            |            |          |
| <b>O-acetylserine</b>              | C00979 | HMDB0003011 | 0.003791   | 0.011373   | 8.9209   | 0.0015773  | 0.0066656  | 5.4506   | 0.0136     | 0.029719   | 5.7883   |
| <b>Ornithine</b>                   | C00077 | HMDB0000214 | 0.0066039  | 0.017283   | 6.7983   | 0.00076937 | 0.0047994  | 7.8217   | 0.00075498 | 0.0046888  | 4.983    |
| <b>Oxaloacetic acid</b>            | C00036 | HMDB0000223 |            |            |          | 0.0019005  | 0.0073226  | 2.7799   |            |            |          |
| <b>Pantothenic acid</b>            | C00864 | HMDB0000210 | 1.8497E-08 | 2.2751E-06 | 0.010814 | 4.1322E-05 | 0.0010443  | 0.004819 | 0.00064027 | 0.0044442  | 0.02153  |
| <b>L-phenylalanine</b>             | C00079 | HMDB0000159 | 3.6174E-05 | 0.00063204 | 0.015089 | 0.00017639 | 0.0019256  | 0.021513 | 0.00046014 | 0.0036198  | 0.011666 |
| <b>Phosphoenolpyruvic acid</b>     | C00074 | HMDB0000263 |            |            |          |            |            |          | 0.012844   | 0.028596   | 9.494    |
| <b>L-proline</b>                   | C00148 | HMDB0000162 | 0.0030984  | 0.0103     | 0.5263   | 2.4737E-06 | 0.00010802 | 0.33541  | 0.014051   | 0.030145   | 0.40524  |
| <b>Purine</b>                      | C15587 | HMDB0001366 |            |            |          |            |            |          | 0.003044   | 0.011587   | 2.8961   |
| <b>Pyridoxamine</b>                | C00534 | HMDB0001431 |            |            |          | 0.021029   | 0.049193   | 3.5676   |            |            |          |
| <b>Pyridoxine</b>                  | C00314 | HMDB0000239 |            |            |          |            |            |          | 0.004461   | 0.01504    | 0.00792  |
| <b>Pyroglutamic acid</b>           | C01879 | HMDB0000267 | 0.021075   | 0.043466   | 0.21879  |            |            |          |            |            |          |
| <b>Pyruvic acid</b>                | C00022 | HMDB0000243 |            |            |          | 0.0013609  | 0.0063673  | 0.22911  |            |            |          |
| <b>Quinolinic acid</b>             | C03722 | HMDB0000232 |            |            |          | 0.01352    | 0.034728   | 4.3866   |            |            |          |

|                                                |                |                         |            |            |          |            |           |          |            |            |          |
|------------------------------------------------|----------------|-------------------------|------------|------------|----------|------------|-----------|----------|------------|------------|----------|
| <b>S-adenosylhomocysteine (pos)</b>            | C00021         | HMDB0000939             | 4.3068E-05 | 0.00063204 | 80.196   |            |           |          |            |            |          |
| <b>S-adenosylmethionine</b>                    | C00019         | HMDB0001185             | 0.01819    | 0.039833   | 0.64257  | 0.010179   | 0.029633  | 0.40304  | 0.023976   | 0.045632   | 0.54147  |
| <b>L-serine</b>                                | C00065, C00740 | HMDB0000187             |            |            |          | 0.011031   | 0.030104  | 2.9809   |            |            |          |
| <b>Spermidine</b>                              | C00315         | HMDB0001257             | 0.00075994 | 0.0044713  | 17.486   |            |           |          | 0.008664   | 0.022719   | 12.428   |
| <b>Succinic acid/Methylmalonic acid</b>        | C00042/C02170  | HMDB0000254/HMDB0000202 | 0.0013883  | 0.0064889  | 15.092   | 4.7831E-05 | 0.0010443 | 17.161   | 0.022507   | 0.043538   | 3.282    |
| <b>Taurine</b>                                 | C00245         | HMDB0000251             | 0.0010563  | 0.0056751  | 0.023534 | 0.00088203 | 0.0052521 | 0.036295 | 0.0047317  | 0.015354   | 0.045481 |
| <b>Thiamine</b>                                | C00378         | HMDB0000235             |            |            |          | 0.00033317 | 0.0027278 | 0.047073 | 0.0076751  | 0.021062   | 0.065683 |
| <b>Thiamine monophosphate</b>                  | C01081         | HMDB0002666             |            |            |          |            |           |          | 0.0080457  | 0.021577   | 8.538    |
| <b>Thymine</b>                                 | C00178         | HMDB0000262             |            |            |          | 0.015597   | 0.037838  | 9.6961   | 6.9652E-05 | 0.00097652 | 6.9419   |
| <b>L-tryptophan</b>                            | C00078         | HMDB0000929             | 0.0025324  | 0.009023   | 0.024412 | 0.0015447  | 0.0066656 | 0.044388 | 2.7163E-05 | 0.00064104 | 0.054614 |
| <b>L-tyrosine</b>                              | C00082         | HMDB0000158             | 0.0069895  | 0.017911   | 0.33606  | 0.010923   | 0.030104  | 0.56868  |            |            |          |
| <b>Uridine 5'-diphosphate (neg)</b>            | C00015         | HMDB0000295             | 0.001537   | 0.0065191  | 0.068079 |            |           |          | 0.0050519  | 0.015354   | 0.13568  |
| <b>Uridine diphosphate glucose</b>             | C00029         | HMDB0000286             |            |            |          | 0.0002935  | 0.0025632 | 0.012843 | 0.0032695  | 0.011691   | 0.037383 |
| <b>Uridine diphosphate glucuronic acid</b>     | C00167         | HMDB0000935             | 0.0034473  | 0.0106     | 0.22834  | 0.00013411 | 0.0017568 | 0.039309 | 0.0030143  | 0.011587   | 0.062934 |
| <b>Uridine diphosphate-N-acetylglucosamine</b> | C00043         | HMDB0000290             | 0.0013379  | 0.0064889  | 0.17082  | 0.00099296 | 0.0054199 | 0.027664 | 0.016317   | 0.034382   | 0.096348 |
| <b>Uridine 5'-monophosphate</b>                | C00105         | HMDB0000288             |            |            |          |            |           |          | 0.00039998 | 0.0034878  | 229.98   |
| <b>Uracil</b>                                  | C00106         | HMDB0000300             | 0.0087882  | 0.021619   | 0.3074   | 0.0056444  | 0.018035  | 0.070756 |            |            |          |
| <b>L-valine</b>                                | C00183         | HMDB0000883             | 0.0043793  | 0.012527   | 2.8996   |            |           |          |            |            |          |

#: Significant differences in metabolite composition as deduced from the univariate test. The original tracked metabolites of the experiment were adopted from a previous study.<sup>18</sup>

^ Fold change: fold change of concentration in mitochondrial fraction was calculated with respect to net concentration in the whole cell. Some metabolites were tracked in two ion modes but could be detected in one ion mode.

**Table S2:** Differentially expressed lipids among the three indicated cell lines.

| Significantly compartmentalized species | A549            |          |             | MDA-MB-231      |          |             | PANCI           |          |             |
|-----------------------------------------|-----------------|----------|-------------|-----------------|----------|-------------|-----------------|----------|-------------|
|                                         | <i>P</i> -value | FDR      | Fold change | <i>P</i> -value | FDR      | Fold change | <i>P</i> -value | FDR      | Fold change |
| ACar 14:0                               | 0.0010026       | 0.024449 | 0.36888     | 0.00032274      | 0.034862 | 0.15579     | 7.6041E-05      | 0.01172  | 0.21531     |
| ACar 16:0                               | 0.0081174       | 0.044815 | 0.58668     |                 |          |             | 0.0076746       | 0.10769  | 0.28766     |
| ACar 18:1                               | 0.006112        | 0.037672 | 0.49465     | 0.0021726       | 0.034862 | 0.23663     | 0.00036413      | 0.023149 | 0.95334     |
| BMP 44:12                               | 0.001899        | 0.024449 | 2.9902      |                 |          |             | 0.0024584       | 0.069757 | 1.9134      |
| CE 22:6                                 | 0.012164        | 0.059695 | 0.57673     | 0.018802        | 0.086576 | 0.38613     | 0.0073495       | 0.10769  | 0.51849     |
| Cer-NDS d40:0                           | 0.014268        | 0.063696 | 1.7021      |                 |          |             | 0.02845         | 0.1957   | 1.2982      |
| Cer-NS d40:1                            | 0.033611        | 0.097944 | 1.67        |                 |          |             |                 |          |             |
| DAG 36:0                                |                 |          |             | 0.0021855       | 0.034862 | 4.2009      | 0.030217        | 0.19931  | 14.073      |
| DAG 36:2                                | 0.01931         | 0.074317 | 0.46459     | 0.011739        | 0.063939 | 0.28566     |                 |          |             |
| DAG 38:3                                | 0.0018436       | 0.024449 | 0.17505     |                 |          |             | 0.0022418       | 0.069757 | 0.16331     |
| DAG 38:4                                | 3.0083E-05      | 0.003986 | 0.090595    | 0.00052724      | 0.034862 | 0.26811     | 0.00010326      | 0.01172  | 0.14557     |
| DAG 40:6                                | 0.0010625       | 0.024449 | 0.171       |                 |          |             | 0.00040791      | 0.023149 | 0.21905     |
| HexCer-NS d42:1                         | 0.0074191       | 0.04274  | 2.1925      |                 |          |             |                 |          |             |
| LPC 14:0-SN1                            | 0.0062875       | 0.037672 | 3.3322      |                 |          |             |                 |          |             |
| LPC 16:0e                               | 0.0053956       | 0.037627 | 1.715       |                 |          |             |                 |          |             |
| LPC 16:1-SN1                            | 0.0039051       | 0.035133 | 2.9852      |                 |          |             | 0.0013972       | 0.059164 | 2.3932      |
| LPC 18:0-SN1                            | 0.0029317       | 0.03137  | 0.50172     | 0.027332        | 0.10236  | 1.7571      | 0.025279        | 0.17932  | 2.234       |
| LPC 18:1-SN1                            |                 |          |             |                 |          |             | 0.02512         | 0.17932  | 1.4867      |
| LPC 20:1e                               | 0.00026726      | 0.011804 | 1.8071      |                 |          |             |                 |          |             |
| LPC 20:3e                               | 0.031364        | 0.097714 | 0.51771     |                 |          |             |                 |          |             |
| LPC 20:4-SN2                            |                 |          |             |                 |          |             | 0.020435        | 0.17181  | 2.6746      |
| LPC 22:6-SN2                            |                 |          |             |                 |          |             | 0.0015638       | 0.059164 | 2.3396      |
| LPC 26:0-SN1                            | 0.036872        | 0.10621  | 1.5922      |                 |          |             |                 |          |             |

|              |            |          |         |           |          |         |          |         |         |
|--------------|------------|----------|---------|-----------|----------|---------|----------|---------|---------|
| LPC 26:1-SN1 | 0.031711   | 0.097714 | 2.9297  |           |          |         |          |         |         |
| PC 28:5e     | 0.0061907  | 0.037672 | 1.8651  |           |          |         |          |         |         |
| PC 30:0e     | 0.042551   | 0.11996  | 1.5005  |           |          |         |          |         |         |
| PC 30:1      |            |          |         | 0.032641  | 0.10777  | 0.57069 |          |         |         |
| PC 30:3      |            |          |         | 0.0084613 | 0.057537 | 0.38809 |          |         |         |
| PC 32:2      |            |          |         | 0.047191  | 0.13569  | 0.52801 |          |         |         |
| PC 32:4      |            |          |         |           |          |         | 0.021552 | 0.17473 | 0.65877 |
| PC 32:8e     | 0.013754   | 0.063696 | 8.8888  |           |          |         |          |         |         |
| PC 34:0e     | 0.005358   | 0.037627 | 1.9196  |           |          |         |          |         |         |
| PC 34:3      |            |          |         | 0.031784  | 0.10777  | 0.56973 |          |         |         |
| PC 34:4      |            |          |         |           |          |         | 0.017651 | 0.16077 | 2.1689  |
| PC 34:4e     | 0.025193   | 0.087583 | 0.71184 |           |          |         |          |         |         |
| PC 34:5      |            |          |         | 0.014723  | 0.073614 | 0.46637 |          |         |         |
| PC 36:0e     | 0.00088369 | 0.024449 | 1.8581  |           |          |         |          |         |         |
| PC 36:1      |            |          |         | 0.0022558 | 0.034862 | 3.393   |          |         |         |
| PC 36:1e     | 0.033634   | 0.097944 | 1.5833  |           |          |         |          |         |         |
| PC 36:3      |            |          |         | 0.010835  | 0.061398 | 0.69339 | 0.016723 | 0.16077 | 0.79924 |
| PC 36:3e     | 0.045503   | 0.12431  | 1.4304  |           |          |         |          |         |         |
| PC 36:4e     |            |          |         |           |          |         | 0.015496 | 0.16077 | 2.2204  |
| PC 36:5      |            |          |         | 0.018695  | 0.086576 | 0.44707 |          |         |         |
| PC 36:6_1    |            |          |         | 0.0046853 | 0.048941 | 0.45836 |          |         |         |
| PC 36:6_2    | 0.014245   | 0.063696 | 0.8165  | 0.0051639 | 0.048941 | 0.51204 |          |         |         |
| PC 36:7      | 0.04908    | 0.12931  | 0.69155 |           |          |         |          |         |         |
| PC 38:1e     | 0.02519    | 0.087583 | 1.1833  |           |          |         |          |         |         |
| PC 38:2e     | 0.00026162 | 0.011804 | 1.4507  |           |          |         |          |         |         |
| PC 38:3      |            |          |         | 0.019316  | 0.086576 | 0.59384 |          |         |         |
| PC 38:5      |            |          |         | 0.039767  | 0.1186   | 0.81607 |          |         |         |



|            |            |          |         |           |          |         |           |         |        |
|------------|------------|----------|---------|-----------|----------|---------|-----------|---------|--------|
| PC 38:5e   | 0.026906   | 0.088975 | 1.3708  |           |          |         |           |         |        |
| PC 38:6    | 0.014065   | 0.063696 | 0.81773 | 0.037823  | 0.11585  | 0.54342 |           |         |        |
| PC 38:7    |            |          |         | 0.023188  | 0.09518  | 0.37236 |           |         |        |
| PC 38:7e_1 | 0.042005   | 0.11969  | 1.172   |           |          |         |           |         |        |
| PC 38:7e_2 | 0.014422   | 0.063696 | 0.66471 |           |          |         |           |         |        |
| PC 38:8    |            |          |         | 0.010141  | 0.061398 | 0.44965 |           |         |        |
| PC 40:1    |            |          |         | 0.026445  | 0.10217  | 0.60524 |           |         |        |
| PC 40:10   | 0.00036395 | 0.013778 | 0.69919 |           |          |         |           |         |        |
| PC 42:10   | 0.012489   | 0.060175 | 0.54579 |           |          |         |           |         |        |
| PC 40:2    |            |          |         | 0.038163  | 0.11585  | 0.53026 |           |         |        |
| PC 40:3    |            |          |         | 0.0018126 | 0.034862 | 0.37241 |           |         |        |
| PC 40:5    |            |          |         | 0.010804  | 0.061398 | 0.58709 |           |         |        |
| PC 40:6    |            |          |         | 0.04789   | 0.13569  | 0.58234 |           |         |        |
| PC 40:7    |            |          |         | 0.020654  | 0.087781 | 0.5347  |           |         |        |
| PC 40:9_1  |            |          |         | 0.0079052 | 0.057537 | 0.52062 | 0.0056335 | 0.10769 | 13.188 |
| PC 40:9_2  |            |          |         | 0.0081749 | 0.057537 | 0.44522 |           |         |        |
| PC 40:9_3  |            |          |         | 0.005679  | 0.048941 | 8.7721  |           |         |        |
| PC 42:0    |            |          |         | 0.0049958 | 0.048941 | 0.50533 |           |         |        |
| PC 42:1    |            |          |         | 0.033961  | 0.10777  | 0.57473 |           |         |        |
| PC 42:11   |            |          |         | 0.033632  | 0.10777  | 0.50686 |           |         |        |
| PC 42:2    |            |          |         | 0.020332  | 0.087781 | 0.46839 |           |         |        |
| PC 42:3    | 0.049418   | 0.12931  | 1.0868  | 0.0083774 | 0.057537 | 0.43294 |           |         |        |
| PC 42:4    | 0.0048643  | 0.037627 | 0.66304 |           |          |         |           |         |        |
| PC 42:4e   | 0.033558   | 0.097944 | 1.9001  |           |          |         |           |         |        |
| PC 42:6e_1 | 0.011307   | 0.056535 | 1.7962  |           |          |         |           |         |        |
| PC 42:6e_2 | 0.024129   | 0.087583 | 1.4597  |           |          |         |           |         |        |
| PC 42:7e   | 0.019311   | 0.074317 | 1.7077  |           |          |         |           |         |        |

|          |           |          |         |           |          |         |           |         |         |
|----------|-----------|----------|---------|-----------|----------|---------|-----------|---------|---------|
| PC 44:12 |           |          |         | 0.012776  | 0.065813 | 0.56105 |           |         |         |
| PC 44:2  |           |          |         | 0.029381  | 0.10523  | 0.45885 |           |         |         |
| PC 44:2e |           |          |         | 0.0081811 | 0.057537 | 0.49029 |           |         |         |
| PC 44:4  |           |          |         | 0.012036  | 0.063939 | 0.4926  |           |         |         |
| PC 44:5  | 0.0018674 | 0.024449 | 0.62245 |           |          |         |           |         |         |
| PC 44:5e | 0.027757  | 0.089703 | 1.8252  |           |          |         |           |         |         |
| PC 44:7e |           |          |         |           |          |         | 0.011318  | 0.13522 | 0.61418 |
| PC 44:8e | 0.002104  | 0.024449 | 1.8523  |           |          |         |           |         |         |
| PC 46:2  |           |          |         | 0.027697  | 0.10236  | 0.56773 |           |         |         |
| PC 46:3  |           |          |         | 0.019352  | 0.086576 | 0.40358 |           |         |         |
| PC 46:4  |           |          |         | 0.034232  | 0.10777  | 0.37668 |           |         |         |
| PC 46:5  |           |          |         | 0.0057577 | 0.048941 | 0.4391  |           |         |         |
| PC 46:8e |           |          |         |           |          |         | 0.030731  | 0.19931 | 0.63222 |
| PC 48:4  |           |          |         | 0.0025317 | 0.034958 | 0.39053 |           |         |         |
| PE 34:0  |           |          |         |           |          |         | 0.0050042 | 0.10769 | 2.4781  |
| PE 36:3e | 0.046346  | 0.12516  | 1.2487  |           |          |         |           |         |         |
| PE 38:2e | 0.017783  | 0.0725   | 1.3085  |           |          |         |           |         |         |
| PE 38:4  |           |          |         | 0.044815  | 0.13135  | 1.2561  |           |         |         |
| PS 34:1  | 0.0452    | 0.12431  | 1.4486  |           |          |         |           |         |         |
| PS 34:2  | 0.020573  | 0.077884 | 1.4481  |           |          |         |           |         |         |
| PS 38:3  | 0.016539  | 0.069413 | 1.384   |           |          |         |           |         |         |
| SM d32:0 | 0.018868  | 0.074317 | 1.9044  |           |          |         |           |         |         |
| SM d32:1 | 0.0095361 | 0.050541 | 1.9616  |           |          |         |           |         |         |
| SM d34:0 | 0.0041745 | 0.035685 | 1.2144  |           |          |         | 0.022544  | 0.17647 | 1.5739  |
| SM d34:2 | 0.0057371 | 0.037672 | 1.4213  |           |          |         |           |         |         |
| SM d34:4 | 0.024523  | 0.087583 | 1.9042  |           |          |         |           |         |         |
| SM d36:1 | 0.0013873 | 0.024449 | 1.8331  |           |          |         |           |         |         |

|                  |            |          |         |           |          |        |           |          |         |
|------------------|------------|----------|---------|-----------|----------|--------|-----------|----------|---------|
| SM d36:5         | 0.0019498  | 0.024449 | 1.4356  |           |          |        |           |          |         |
| SM d38:0         | 0.0057631  | 0.037672 | 1.3818  |           |          |        |           |          |         |
| SM d38:1         | 0.0030778  | 0.03137  | 1.6109  |           |          |        |           |          |         |
| SM d40:0         | 0.0052908  | 0.037627 | 2.2769  |           |          |        |           |          |         |
| SM d40:1         | 0.0001779  | 0.011804 | 1.8956  |           |          |        |           |          |         |
| SM d40:2         | 0.00020249 | 0.011804 | 1.6673  |           |          |        |           |          |         |
| SM d42:3         |            |          |         | 0.032733  | 0.10777  | 1.2653 |           |          |         |
| SM d42:4         | 0.044785   | 0.12431  | 1.5759  |           |          |        |           |          |         |
| SM d44:1         | 0.016764   | 0.069413 | 1.8812  |           |          |        |           |          |         |
| SM d44:2         | 0.015276   | 0.066363 | 1.9408  |           |          |        |           |          |         |
| Sphingosine 18:1 | 0.027185   | 0.088975 | 2.6606  |           |          |        |           |          |         |
| TAG 42:0         |            |          |         | 0.0026733 | 0.034958 | 6.1598 | 0.0071527 | 0.10769  | 4.3777  |
| TAG 42:2         |            |          |         | 0.024426  | 0.096569 | 4.8557 |           |          |         |
| TAG 44:1         |            |          |         | 0.0019621 | 0.034862 | 12.995 | 0.0091787 | 0.11575  | 7.8306  |
| TAG 44:2         |            |          |         | 0.0030416 | 0.036934 | 11.969 |           |          |         |
| TAG 46:2         |            |          |         | 0.0016061 | 0.034862 | 24.895 | 0.003835  | 0.096727 | 10.155  |
| TAG 46:3         |            |          |         | 0.001729  | 0.034862 | 7.4508 |           |          |         |
| TAG 48:2         |            |          |         | 0.0097435 | 0.061398 | 7.3714 |           |          |         |
| TAG 48:3         |            |          |         | 0.002083  | 0.034862 | 15.569 | 0.017438  | 0.16077  | 6.6312  |
| TAG 50:1         | 0.0083195  | 0.044993 | 0.60802 |           |          |        |           |          |         |
| TAG 50:1e        | 0.0029696  | 0.03137  | 0.40855 |           |          |        |           |          |         |
| TAG 50:3         | 0.03359    | 0.097944 | 0.55375 | 0.023515  | 0.09518  | 5.8064 |           |          |         |
| TAG 50:4         |            |          |         | 0.010753  | 0.061398 | 4.3765 |           |          |         |
| TAG 50:6         | 0.0015472  | 0.024449 | 0.41487 |           |          |        |           |          |         |
| TAG 52:2         | 0.0014769  | 0.024449 | 0.58535 |           |          |        | 0.00707   | 0.10769  | 0.45122 |
| TAG 52:2e        | 0.0037642  | 0.035133 | 0.39177 |           |          |        |           |          |         |
| TAG 52:5         | 0.0019079  | 0.024449 | 0.57618 |           |          |        |           |          |         |

|           |            |          |         |           |          |         |           |         |         |
|-----------|------------|----------|---------|-----------|----------|---------|-----------|---------|---------|
| TAG 52:6  | 0.02326    | 0.085609 | 0.46878 |           |          |         | 0.018414  | 0.16077 | 0.67571 |
| TAG 52:7  | 0.0049417  | 0.037627 | 0.48074 |           |          |         |           |         |         |
| TAG 52:8  | 0.0038601  | 0.035133 | 0.40784 |           |          |         |           |         |         |
| TAG 54:1e | 0.0039773  | 0.035133 | 0.432   |           |          |         |           |         |         |
| TAG 54:2  | 0.027196   | 0.088975 | 0.44514 |           |          |         |           |         |         |
| TAG 54:3  | 0.0013427  | 0.024449 | 0.42564 |           |          |         | 0.0080647 | 0.10769 | 0.44381 |
| TAG 54:4  |            |          |         |           |          |         | 0.017435  | 0.16077 | 0.54122 |
| TAG 54:5  | 0.0010157  | 0.024449 | 0.50254 |           |          |         |           |         |         |
| TAG 54:6  |            |          |         | 0.029713  | 0.10523  | 0.47248 |           |         |         |
| TAG 54:7  | 0.0015405  | 0.024449 | 0.43655 |           |          |         | 0.018397  | 0.16077 | 0.63942 |
| TAG 56:4  | 0.010421   | 0.053108 | 0.41986 |           |          |         | 0.024269  | 0.17932 | 0.37805 |
| TAG 56:5  | 0.010258   | 0.053108 | 0.40489 |           |          |         |           |         |         |
| TAG 56:6  | 0.0049476  | 0.037627 | 0.40478 | 0.001004  | 0.034862 | 0.29135 | 0.0061669 | 0.10769 | 0.42497 |
| TAG 56:7  |            |          |         | 0.0054187 | 0.048941 | 0.40139 |           |         |         |
| TAG 56:7e | 0.025525   | 0.087583 | 0.38905 |           |          |         |           |         |         |
| TAG 56:9  | 2.9909E-05 | 0.003986 | 0.49838 |           |          |         |           |         |         |
| TAG 58:1  | 0.046758   | 0.12516  | 0.5995  |           |          |         |           |         |         |
| TAG 58:11 | 0.032625   | 0.097944 | 0.45124 |           |          |         |           |         |         |
| TAG 58:2  | 0.015698   | 0.067096 | 0.47342 |           |          |         |           |         |         |
| TAG 58:4  | 0.01935    | 0.074317 | 0.49617 |           |          |         |           |         |         |
| TAG 58:5  | 0.005045   | 0.037627 | 0.4357  |           |          |         |           |         |         |
| TAG 60:2  | 0.029029   | 0.092682 | 0.44475 |           |          |         |           |         |         |
| TAG 60:4  | 0.031377   | 0.097714 | 0.42856 |           |          |         |           |         |         |
| TAG 60:5  | 0.025779   | 0.087583 | 0.41155 |           |          |         |           |         |         |
| TAG 62:14 | 0.022064   | 0.082353 | 0.43879 |           |          |         |           |         |         |
| TAG 62:3  | 0.0063911  | 0.037672 | 0.40495 |           |          |         |           |         |         |
| TAG 62:4  | 0.0063972  | 0.037672 | 0.40213 |           |          |         |           |         |         |

|            |            |          |         |           |          |         |
|------------|------------|----------|---------|-----------|----------|---------|
| TAG 64:3   | 0.0076961  | 0.043393 | 0.45891 |           |          |         |
| TAG 64:4   | 0.002122   | 0.024449 | 0.37692 |           |          |         |
| LPC 16:0e  | 0.0053956  | 0.037627 | 1.715   |           |          |         |
| LPC 20:1e  | 0.00026726 | 0.011804 | 1.8071  |           |          |         |
| LPC 20:3e  | 0.031364   | 0.097714 | 0.51771 |           |          |         |
| PC 28:5e   | 0.0061907  | 0.037672 | 1.8651  |           |          |         |
| PC 30:0e   | 0.042551   | 0.11996  | 1.5005  |           |          |         |
| PC 32:8e   | 0.013754   | 0.063696 | 8.8888  |           |          |         |
| PC 34:0e   | 0.005358   | 0.037627 | 1.9196  |           |          |         |
| PC 34:4e   | 0.025193   | 0.087583 | 0.71184 |           |          |         |
| PC 36:0e   | 0.00088369 | 0.024449 | 1.8581  |           |          |         |
| PC 36:1e   | 0.033634   | 0.097944 | 1.5833  |           |          |         |
| PC 36:3e   | 0.045503   | 0.12431  | 1.4304  |           |          |         |
| PC 36:4e   |            |          |         | 0.015496  | 0.16077  | 2.2204  |
| PC 38:1e   | 0.02519    | 0.087583 | 1.1833  |           |          |         |
| PC 38:2e   | 0.00026162 | 0.011804 | 1.4507  |           |          |         |
| PC 38:5e   | 0.026906   | 0.088975 | 1.3708  |           |          |         |
| PC 38:7e_1 | 0.042005   | 0.11969  | 1.172   |           |          |         |
| PC 38:7e_2 | 0.014422   | 0.063696 | 0.66471 |           |          |         |
| PC 42:4e   | 0.033558   | 0.097944 | 1.9001  |           |          |         |
| PC 42:6e_1 | 0.011307   | 0.056535 | 1.7962  |           |          |         |
| PC 42:6e_2 | 0.024129   | 0.087583 | 1.4597  |           |          |         |
| PC 42:7e   | 0.019311   | 0.074317 | 1.7077  |           |          |         |
| PC 44:2e   |            |          |         | 0.0081811 | 0.057537 | 0.49029 |
| PC 44:5e   | 0.027757   | 0.089703 | 1.8252  |           |          |         |
| PC 44:7e   |            |          |         | 0.011318  | 0.13522  | 0.61418 |
| PC 44:8e   | 0.002104   | 0.024449 | 1.8523  |           |          |         |

|           |           |          |         |          |         |         |
|-----------|-----------|----------|---------|----------|---------|---------|
| PC 46:8e  |           |          |         | 0.030731 | 0.19931 | 0.63222 |
| PE 36:3e  | 0.046346  | 0.12516  | 1.2487  |          |         |         |
| PE 38:2e  | 0.017783  | 0.0725   | 1.3085  |          |         |         |
| TAG 50:1e | 0.0029696 | 0.03137  | 0.40855 |          |         |         |
| TAG 52:2e | 0.0037642 | 0.035133 | 0.39177 |          |         |         |
| TAG 54:1e | 0.0039773 | 0.035133 | 0.432   |          |         |         |
| TAG 56:7e | 0.025525  | 0.087583 | 0.38905 |          |         |         |

---

\* Fold change: concentration in mitochondrial fraction vs concentration in whole cell. Reported lipids are sum compositions unless the fatty acyl constituents can be confidently determined.

**Table S3:** MS-DIAL lipid data alignment and processing.

| <b>MS-DIAL: Analysis parameter setting</b> |                                                                                                                                                                 |
|--------------------------------------------|-----------------------------------------------------------------------------------------------------------------------------------------------------------------|
| <b>Data collection</b>                     |                                                                                                                                                                 |
| <b>MS1 tolerance</b>                       | 0.03 Da                                                                                                                                                         |
| <b>MS2 tolerance</b>                       | 0.05 Da                                                                                                                                                         |
| <b>Retention time begin</b>                | 0.3 min                                                                                                                                                         |
| <b>Retention time end</b>                  | 12.6 min                                                                                                                                                        |
| <b>Mass range begin</b>                    | 280 Da                                                                                                                                                          |
| <b>Mass range end</b>                      | 1200 Da                                                                                                                                                         |
| <b>Maximum charged number</b>              | 2                                                                                                                                                               |
| <b>Peak detection</b>                      |                                                                                                                                                                 |
| <b>Minimum peak height</b>                 | 500 amplitude                                                                                                                                                   |
| <b>Mass slice width</b>                    | 0.05 Da                                                                                                                                                         |
| <b>Smoothing method</b>                    | Savitzky-Golay filter                                                                                                                                           |
| <b>Smoothing level</b>                     | 3 scan                                                                                                                                                          |
| <b>Minimum peak width</b>                  | 5 scan                                                                                                                                                          |
| <b>MS2 Dec</b>                             |                                                                                                                                                                 |
| <b>Sigma window value</b>                  | 0.5                                                                                                                                                             |
| <b>MS/MS abundance cut off</b>             | 0 amplitude                                                                                                                                                     |
| <b>Exclude after precursor ion</b>         | checked                                                                                                                                                         |
| <b>Keep the isotopic ions until</b>        | 0.5 Da                                                                                                                                                          |
| <b>Identification</b>                      |                                                                                                                                                                 |
| <b>Retention time tolerance</b>            | 0.15 min                                                                                                                                                        |
| <b>Accurate mass tolerance (MS1)</b>       | 0.03 Da                                                                                                                                                         |
| <b>Accurate mass tolerance (MS2)</b>       | 0.05 Da                                                                                                                                                         |
| <b>Identification score cut off</b>        | 70%                                                                                                                                                             |
| <b>Adduct</b>                              | [M+H] <sup>+</sup> , [M+NH <sub>4</sub> ] <sup>+</sup> , [M+Na] <sup>+</sup> ,<br>[M+CH <sub>3</sub> OH+H] <sup>+</sup> and [M+H-H <sub>2</sub> O] <sup>+</sup> |
| <b>Alignment</b>                           |                                                                                                                                                                 |
| <b>Reference file</b>                      | A working QC sample in the sequence                                                                                                                             |
| <b>Retention time tolerance</b>            | 0.1 min                                                                                                                                                         |
| <b>MS1 tolerance</b>                       | 0.025 Da                                                                                                                                                        |
| <b>Advanced</b>                            | Default                                                                                                                                                         |

**Figure S1.** The expression level of FASN, ACC, SLC25A1, and ACLY in the three indicated cancer cell lines.

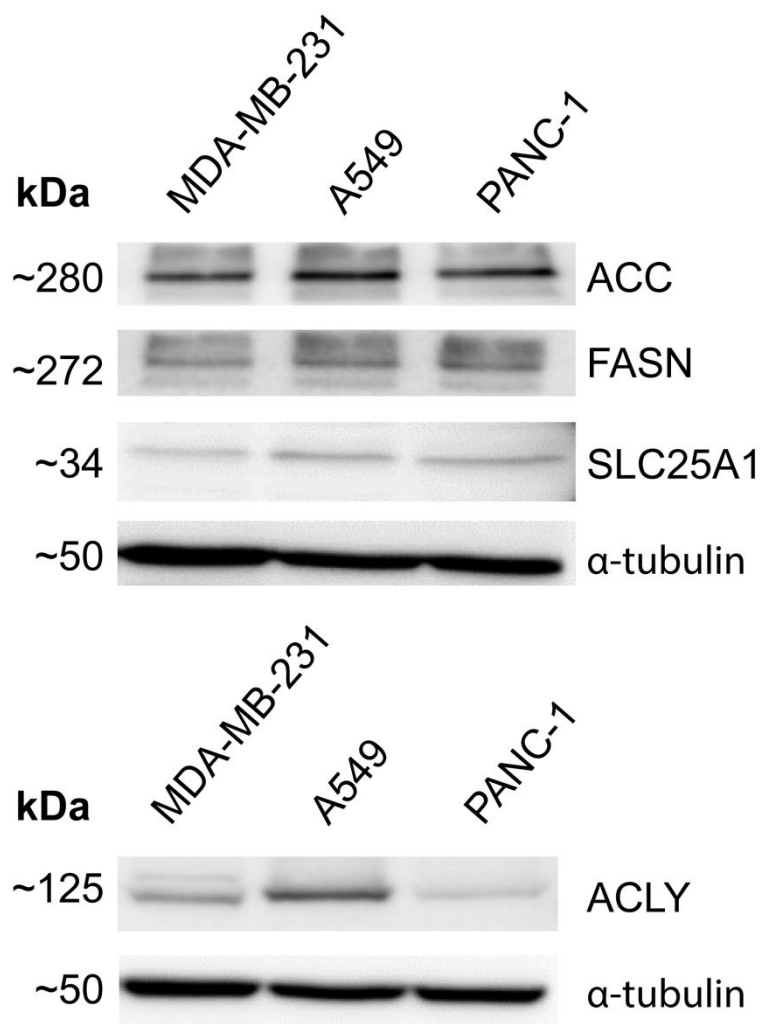



**Figure S2:** Lipid compositions of mitochondria and bulk A549 cells.

[A549]

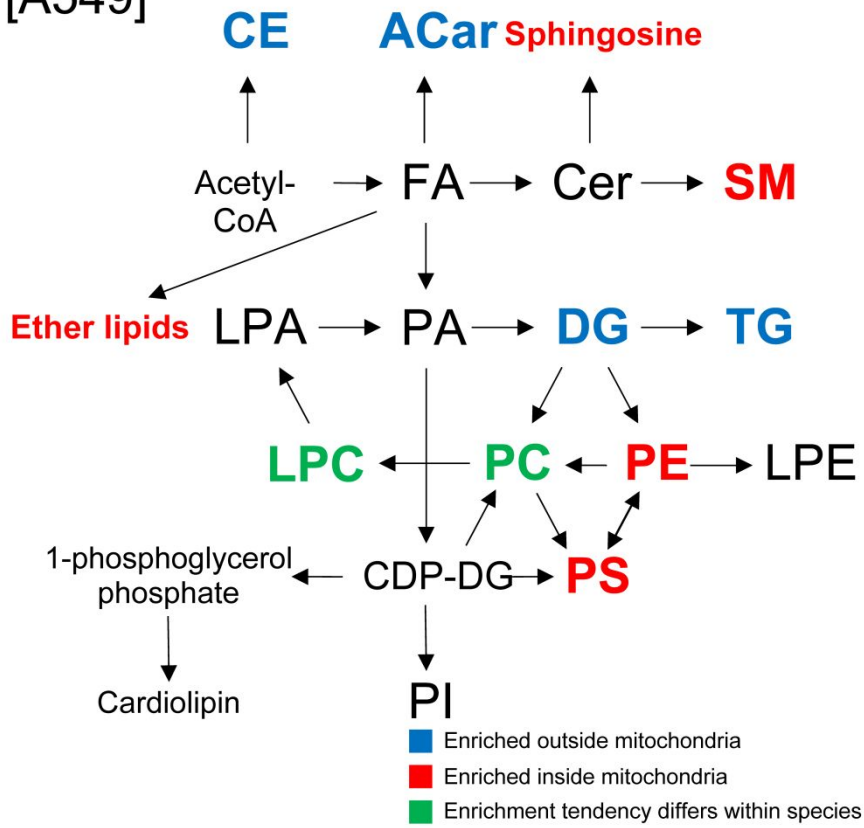

**Figure S3:** Lipid compositions of mitochondria and bulk MDA-MB-231 cells.

[MDA-MB-231]

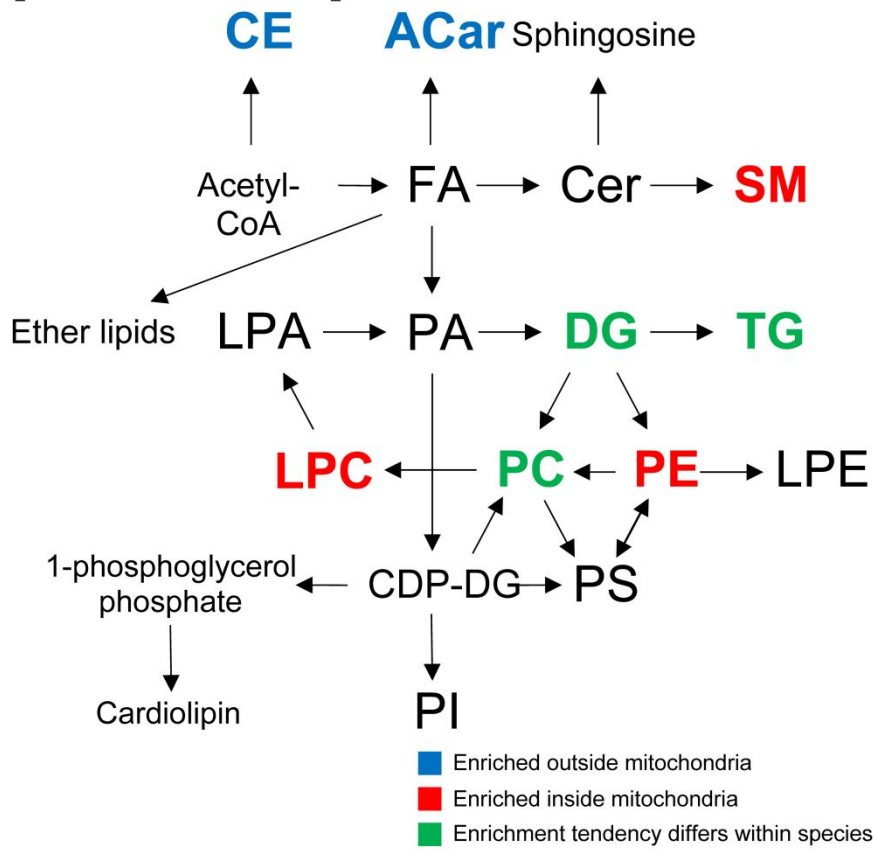

**Figure S4:** Lipid compositions of mitochondria and bulk PANC1 cells.

[PANC1]

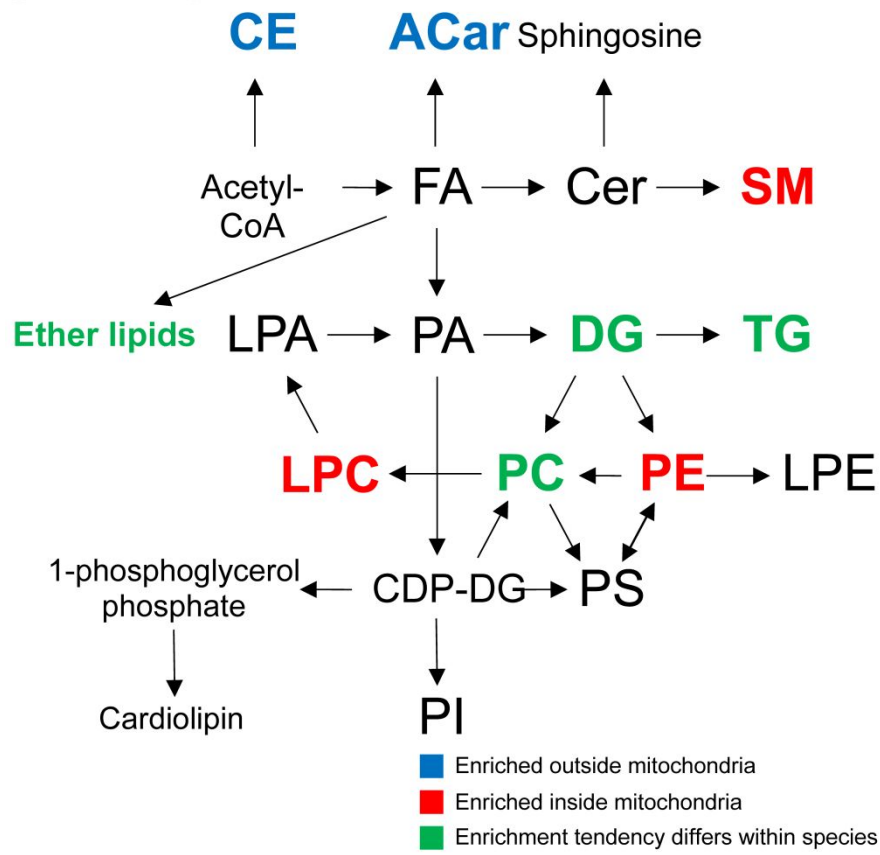

Supplement: ao0c03612_si_001.pdf [file ao0c03612_si_001.pdf]
